# Supplementary material for: Determination of major and trace elements in plant samples by inductively coupled plasma optical emission spectrometry with deep eutectic solvent extraction based on choline chloride and carboxylic acids
Source: Royal Society of Chemistry journal article supplement (doi:10.1039/d3ay00958k), 2023-01-01
Supplement: d3ay00958k1.pdf [file d3ay00958k1.pdf]

## Supporting Information

Determination of major and trace elements in plant samples by  
inductively coupled plasma optical emission spectrometry with deep  
eutectic solvent extraction based on choline chloride-carboxylic acids  
Wenzhi Zhao<sup>a, b</sup>, Yanfeng Sun<sup>a</sup>, Xiaoyong Wei<sup>a</sup>, Guangyuan Niu<sup>a</sup>, Chuanfang Zhou<sup>a\*</sup>

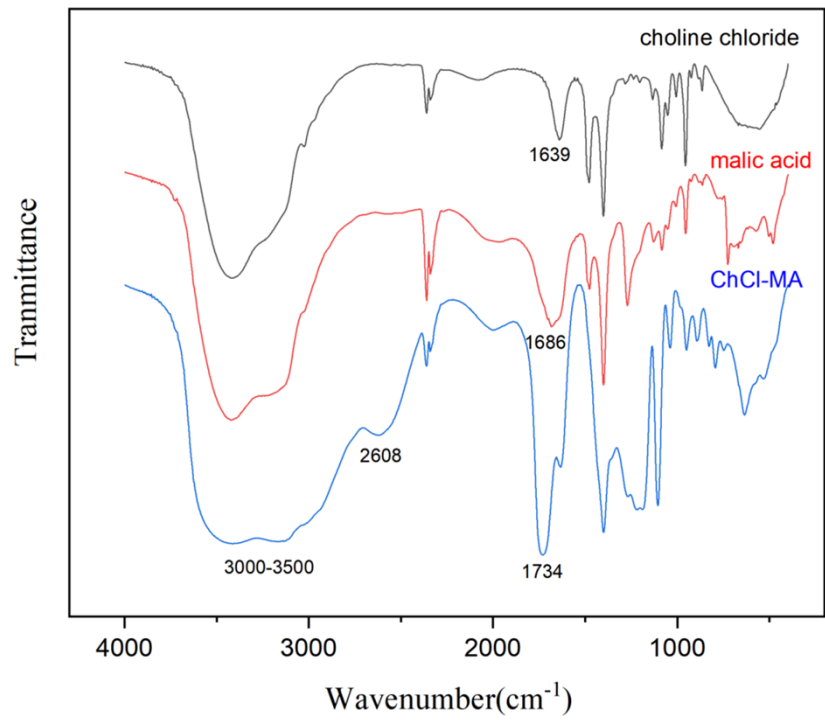

**Fig. S1.** FT-IR spectra of the synthesized DESs and the initial reagents

**Table 1s.** Effect of the hydrogen bond donor type (sample mass 0.1 g, DES mass 0.5 g, Ultrasound for 40 min, 1ChCl:1.5HBD).

| Sample | Element | Certified<br>(mg/kg) | ChCl-OX             |             | ChCl-CI             |          | ChCl-MA             |            | ChCl-MAL            |       |
|--------|---------|----------------------|---------------------|-------------|---------------------|----------|---------------------|------------|---------------------|-------|
|        |         |                      | Measured<br>(mg/kg) | R (%)       | Measured<br>(mg/kg) | R (%)    | Measured<br>(mg/kg) | R (%)      | Measured<br>(mg/kg) | R (%) |
| GSB2a  | Ca      | 300±20               | 280±10aA            | 93          | 292±11bB            | 97       | 304±5.0cB           | 101        | 323±11dC            | 108   |
|        | Fe      | 25±2                 | 22.6±1.4aA          | 90          | 27.8±0.6cC          | 111      | 25.7±0.8bB          | 103        | 28.4±1.4cC          | 114   |
|        | K*      | 0.22±0.01            | 0.23±0.01bB         | 105         | 0.24±0.01cC         | 109      | 0.21±0.01aA         | 95         | 0.24±0.01bcBC       | 109   |
|        | Mg*     | 0.62±0.04            | 0.63±0.02aA         | 102         | 0.66±0.03bAB        | 106      | 0.63±0.02aA         | 102        | 0.67±0.02bB         | 108   |
|        | Mn      | 10.0±0.4             | 10.8±0.3dD          | 108         | 9.1±0.3bB           | 91       | 9.7±0.3cC           | 97         | 8.5±0.3aA           | 85    |
|        | Na      | 37±5                 | 34.5±0.9abAB        | 93          | 33.7±0.7aA          | 91       | 35.5±0.7bB          | 96         | 39.1±1.6cC          | 106   |
|        | P*      | 0.18±0.01            | 0.177±0.003bB       | 98          | 0.181±0.004cB       | 101      | 0.181±0.002cB       | 101        | 0.169±0.002aA       | 94    |
|        | S*      | 0.15±0.01            | 0.141±0.009aA       | 94          | 0.164±0.004bB       | 109      | 0.159±0.004bB       | 106        | 0.163±0.006bB       | 109   |
|        | Zn      | 12.3±1.5             | 13.0±0.6bbB         | 106         | 11.4±0.9aA          | 93       | 12.1±0.4aAB         | 98         | 11.3±0.7aA          | 92    |
| GSB4   | Ca*     | 0.153±0.008          | 0.145±0.005bBC      | 95          | 0.142±0.003bB       | 93       | 0.152±0.007cC       | 99         | 0.128±0.003aA       | 84    |
|        | Fe      | 139±4                | 141±7cC             | 101         | 131±9bB             | 94       | 143±4cC             | 103        | 102±6aA             | 73    |
|        | K*      | 1.86±0.09            | 1.83±0.05aA         | 98          | 1.81±0.05aA         | 97       | 1.92±0.05bB         | 103        | 1.79±0.06aA         | 96    |
|        | Mg*     | 0.23±0.014           | 0.232±0.006bB       | 101         | 0.225±0.007bB       | 98       | 0.233±0.005bB       | 101        | 0.197±0.011aA       | 86    |
|        | Mn      | 28.0±1               | 27.9±0.5cC          | 100         | 26.2±1.1bB          | 94       | 27.8±0.7cC          | 99         | 21.5±1.5aA          | 77    |
|        | Na      | (15)                 | 12.3±0.6bB          | 82          | 13.1±1cB            | 87       | 15.7±0.2dC          | 105        | 10.9±0.5aA          | 73    |
|        | P*      | 0.66±0.03            | 0.659±0.014bcB      | 100         | 0.645±0.023bB       | 98       | 0.67±0.01cB         | 102        | 0.6±0.017aA         | 91    |
|        | S*      | 0.364±0.027          | 0.322±0.01aA        | 88          | 0.344±0.014bB       | 95       | 0.367±0.003cC       | 101        | 0.358±0.009cBC      | 98    |
| Zn     | 38.0±2  | 36.9±1.7aAB          | 97                  | 36.7±1.1aAB | 97                  | 36±1.4aA | 95                  | 39.1±2.0bB | 103                 |       |

Values are for mean±standard deviation of seven replicate measurements (n=7); Values in parenthesis are reference value; \* Concentration unit is %; Different lowercase letters indicate the significance of different hydrogen bond donor types for the same element at p <0.05; Different capital letters indicate the significance of different hydrogen bond donor types for the same element at p <0.01

**Table S2** Analysis results of target analytes in GSB2a by ICP-OES under different DES mass

| Elements | Certified<br>(mg/kg) | 0.1g                |      | 0.25g               |      | 0.5g                |      | 1g                  |      |
|----------|----------------------|---------------------|------|---------------------|------|---------------------|------|---------------------|------|
|          |                      | Measured<br>(mg/kg) | R(%) | Measured<br>(mg/kg) | R(%) | Measured<br>(mg/kg) | R(%) | Measured<br>(mg/kg) | R(%) |
| Ca*      | 0.153±0.008          | 0.084±0.004aA       | 55   | 0.125±0.007bB       | 82   | 0.152±0.007cC       | 99   | 0.158±0.007cC       | 103  |
| Fe       | 139±4                | 98.7±3.3aA          | 71   | 108.4±6.5bB         | 78   | 143±4.2dD           | 103  | 129.3±3.1cC         | 93   |
| K*       | 1.86±0.09            | 1.14±0.04aA         | 61   | 1.34±0.04bB         | 72   | 1.92±0.05cC         | 103  | 1.90±0.03cC         | 102  |
| Mg*      | 0.23±0.014           | 0.163±0.01aA        | 71   | 0.175±0.01bB        | 76   | 0.233±0.005cC       | 101  | 0.237±0.01cC        | 103  |
| Mn       | 28.0±1               | 21±1.6aA            | 75   | 23.2±0.8bB          | 83   | 27.8±0.7cC          | 99   | 27.4±1.4cC          | 98   |
| Na       | (15)                 | 10.4±0.7aA          | 69   | 12.9±0.7bB          | 86   | 15.7±0.2dD          | 105  | 14.6±0.9cC          | 97   |
| P*       | 0.66±0.03            | 0.416±0.01aA        | 63   | 0.482±0.01bB        | 73   | 0.67±0.01cC         | 102  | 0.673±0.01cC        | 102  |
| S*       | 0.364±0.027          | 0.24±0.01aA         | 66   | 0.288±0.01bB        | 79   | 0.367±0.003cC       | 101  | 0.397±0.01dD        | 109  |
| Zn       | 38.0±2               | 28.5±1aA            | 75   | 33.4±1.2bB          | 88   | 36.0±1.4cC          | 95   | 39.5±0.8dD          | 104  |

Values are for mean±standard deviation of seven replicate measurements (n=7); Values in parenthesis are reference value; \* Concentration unit is %; Different lowercase letters indicate the significance of different DES mass for the same element at p <0.05; Different capital letters indicate the significance of different DES mass for the same element at p <0.01

**Table S3** Analysis results of target analytes in GSB2a by ICP-OES under different ultrasonic time

| Elements | Certified<br>(mg/kg) | 10 min              |      | 20 min              |      | 30 min              |      | 40 min              |      |
|----------|----------------------|---------------------|------|---------------------|------|---------------------|------|---------------------|------|
|          |                      | Measured<br>(mg/kg) | R(%) | Measured<br>(mg/kg) | R(%) | Measured<br>(mg/kg) | R(%) | Measured<br>(mg/kg) | R(%) |
| Ca*      | 0.153±0.008          | 0.087±0.01aA        | 57   | 0.109±0.01bB        | 71   | 0.139±0.01cC        | 91   | 0.152±0.007dD       | 99   |
| Fe       | 139±4                | 97.3±6.6aA          | 70   | 115.4±4bB           | 83   | 146±3.9cC           | 105  | 143±4.2cC           | 103  |
| K*       | 1.86±0.09            | 1.14±0.03aA         | 61   | 1.40±0.06bB         | 75   | 1.77±0.05cC         | 95   | 1.92±0.05dD         | 103  |
| Mg*      | 0.23±0.014           | 0.136±0.01aA        | 59   | 0.173±0.01bB        | 75   | 0.237±0.003cC       | 103  | 0.233±0.005cC       | 101  |
| Mn       | 28.0±1               | 15.1±0.6aA          | 54   | 22.7±1.3bB          | 81   | 28.8±1cC            | 103  | 27.8±0.7cC          | 99   |
| Na       | (15)                 | 8.55±0.5aA          | 57   | 12.9±0.3bB          | 86   | 14.4±0.6cC          | 96   | 15.7±0.2dD          | 105  |
| P*       | 0.66±0.03            | 0.436±0.02aA        | 66   | 0.528±0.014bB       | 80   | 0.647±0.007cC       | 98   | 0.67±0.01dD         | 102  |
| S*       | 0.364±0.027          | 0.197±0.007aA       | 54   | 0.288±0.006bB       | 79   | 0.368±0.005cC       | 101  | 0.367±0.003cC       | 101  |
| Zn       | 38.0±2               | 22.0±1.6aA          | 58   | 33.8±1.4bB          | 89   | 36.9±0.9cC          | 97   | 36.0±1.4cC          | 95   |

Values are for mean±standard deviation of seven replicate measurements (n=7); Values in parenthesis are reference value; \* Concentration unit is %; Different lowercase letters indicate the significance of different ultrasonic time for the same element at p <0.05; ; Different capital letters indicate the significance of different ultrasonic time for the same element at p <0.01

**Table S4** Analysis results of target analytes in GSB4 by ICP-OES under different DES composition

| Elements | Certified(mg/kg) | 1:1              |      | 1:1.5            |      | 1:2              |      | 1:2.5            |      |
|----------|------------------|------------------|------|------------------|------|------------------|------|------------------|------|
|          |                  | Measured (mg/kg) | R(%) |
| Ca*      | 0.153±0.008      | 0.122±0.01bAB    | 80   | 0.152±0.007cC    | 99   | 0.125±0.004bB    | 82   | 0.115±0.003aA    | 75   |
| Fe       | 139±4            | 145±3.7aA        | 104  | 143±4.2aA        | 103  | 141±3.9aA        | 101  | 142±3.8aA        | 102  |
| K*       | 1.86±0.09        | 2.05±0.1cC       | 110  | 1.92±0.05bB      | 103  | 1.74±0.1aA       | 94   | 1.71±0.1aA       | 92   |
| Mg*      | 0.23±0.014       | 0.234±0.005aA    | 102  | 0.233±0.005aA    | 101  | 0.229±0.009aA    | 100  | 0.227±0.008aA    | 99   |
| Mn       | 28.0±1           | 29.7±1.8bB       | 106  | 27.8±0.7aAB      | 99   | 27.2±1.2aA       | 97   | 26.7±1.2aA       | 95   |
| Na       | (15)             | 11.9±0.7aA       | 79   | 15.7±0.2cC       | 105  | 13.2±0.9bB       | 88   | 12.8±0.8bAB      | 85   |
| P*       | 0.66±0.03        | 0.71±0.01cC      | 108  | 0.67±0.01aA      | 102  | 0.69±0.01bB      | 105  | 0.72±0.01dC      | 109  |
| S*       | 0.364±0.027      | 0.314±0.01aA     | 86   | 0.367±0.003cB    | 101  | 0.355±0.02bB     | 98   | 0.351±0.01B      | 96   |
| Zn       | 38.0±2           | 39.4±1.2bB       | 104  | 36.0±1.4aA       | 95   | 36.7±1.8aA       | 97   | 35.4±1.8aA       | 93   |

Values are for mean±standard deviation of seven replicate measurements (n=7); Values in parenthesis are reference value; \* Concentration unit is %; Different lowercase letters indicate the significance of different DES composition for the same element at p <0.05; ; Different capital letters indicate the significance of different DES composition for the same element at p <0.01

**Table S5** Analysis results of target analytes in GSB1a by ICP-OES

| Analysis content                                                    | GSS 1      |           |        |           |        |           |        |           |        |           |        |           |        |           |        |           |        |           |
|---------------------------------------------------------------------|------------|-----------|--------|-----------|--------|-----------|--------|-----------|--------|-----------|--------|-----------|--------|-----------|--------|-----------|--------|-----------|
|                                                                     | Ca         |           | Fe     |           | K      |           | Mg     |           | Mn     |           | Na     |           | P      |           | S      |           | Zn     |           |
|                                                                     | Value<br>s | RE<br>(%) | Values | RE<br>(%) |
| Concentrations<br>determined of target<br>analytes (mg/kg)<br>(n=7) | 70.7       | 1.0       | 4.88   | 22.0      | 916    | 1.8       | 128    | -1.5      | 10.3   | -6.4      | 12.0   | 1.7       | 751.2  | -3.7      | 913    | -8.7      | 14.1   | 6.0       |
|                                                                     | 71.5       | 2.1       | 4.59   | 14.8      | 860    | -4.4      | 140    | 7.7       | 11.9   | 8.2       | 12.7   | 7.6       | 744.0  | -4.6      | 863    | -13.7     | 14.6   | 9.8       |
|                                                                     | 72.1       | 3.0       | 4.41   | 10.3      | 883    | -1.9      | 128    | -1.5      | 10.7   | -2.7      | 13.4   | 13.6      | 763.6  | -2.1      | 814    | -18.6     | 13.9   | 4.5       |
|                                                                     | 68.7       | -1.9      | 4.63   | 15.8      | 887    | -1.4      | 140    | 7.7       | 11.8   | 7.3       | 12.8   | 8.5       | 728.0  | -6.7      | 880    | -12.0     | 14.4   | 8.3       |
|                                                                     | 73.5       | 5.0       | 4.79   | 19.8      | 876    | -2.7      | 136    | 4.6       | 12.2   | 10.9      | 12.8   | 8.5       | 795.7  | 2.0       | 869    | -13.1     | 14.0   | 5.3       |
|                                                                     | 74.8       | 6.9       | 4.40   | 10.0      | 921    | 2.3       | 135    | 3.8       | 11.5   | 4.5       | 12.4   | 5.1       | 763.6  | -2.1      | 836    | -16.4     | 14.9   | 12.0      |
|                                                                     | 69.0       | -1.4      | 4.52   | 13.0      | 872    | -3.1      | 138    | 6.2       | 10.8   | -1.8      | 12.9   | 9.3       | 760.1  | -2.6      | 884    | -11.6     | 13.0   | -2.3      |
| Average value<br>(mg/kg)                                            | 71.5       |           | 4.6    |           | 888    |           | 135    |           | 11.3   |           | 12.7   |           | 758.0  |           | 866    |           | 14.1   |           |
| Reference value<br>(mg/kg)                                          | 70         |           | 4      |           | 900    |           | 130    |           | 11.0   |           | 11.8   |           | 780.0  |           | 1000   |           | 13.3   |           |
| Relative error (%)                                                  | 2.1        |           | 15.1   |           | -1.3   |           | 3.7    |           | 2.7    |           | 7.6    |           | -2.8   |           | -13.4  |           | 6.2    |           |
| Standard deviation<br>(mg/kg)                                       | 2.2        |           | 0.2    |           | 22.7   |           | 5.0    |           | 0.7    |           | 0.4    |           | 20.9   |           | 32.5   |           | 0.6    |           |
| Relative standard<br>deviation (RSD) (%)                            | 3.1        |           | 3.9    |           | 2.6    |           | 3.7    |           | 6.3    |           | 3.5    |           | 2.8    |           | 3.8    |           | 4.5    |           |
| $\Delta \log C$                                                     | 0.009      |           | 0.061  |           | -0.006 |           | 0.016  |           | 0.012  |           | 0.032  |           | -0.012 |           | -0.063 |           | 0.026  |           |

**Table S6** Analysis results of target analytes in GSB4 by ICP-OES

| Analysis content                                           | GSS 1  |        |        |        |         |        |        |        |        |        |        |        |        |        |        |        |        |        |
|------------------------------------------------------------|--------|--------|--------|--------|---------|--------|--------|--------|--------|--------|--------|--------|--------|--------|--------|--------|--------|--------|
|                                                            | Ca     |        | Fe     |        | K       |        | Mg     |        | Mn     |        | Na     |        | P      |        | S      |        | Zn     |        |
| Concentrations determined of target analytes (mg/kg) (n=7) | Values | RE (%) | Values | RE (%) | Values  | RE (%) | Values | RE (%) | Values | RE (%) | Values | RE (%) | Values | RE (%) | Values | RE (%) | Values | RE (%) |
|                                                            | 1509.6 | -1.3   | 143.0  | 2.9    | 19744   | 6.2    | 2289   | -0.5   | 27.7   | -1.1   | 15.3   | 2.0    | 6919   | 4.8    | 3583   | -1.6   | 36.4   | -4.2   |
|                                                            | 1591.2 | 4.0    | 150.1  | 8.0    | 18304   | -1.6   | 2336   | 1.6    | 26.9   | -3.9   | 15.5   | 3.3    | 6868   | 4.1    | 3779   | 3.8    | 38.7   | 1.8    |
|                                                            | 1559.2 | 1.9    | 141.6  | 1.9    | 20192   | 8.6    | 2406   | 4.6    | 28.8   | 2.9    | 16.0   | 6.7    | 6828   | 3.5    | 3674   | 0.9    | 36.7   | -3.4   |
|                                                            | 1536.8 | 0.4    | 145.1  | 4.4    | 18489   | -0.6   | 2419   | 5.2    | 27.8   | -0.7   | 15.8   | 5.3    | 6861   | 4.0    | 3757   | 3.2    | 36.0   | -5.3   |
|                                                            | 1482.4 | -3.1   | 142.1  | 2.2    | 19184   | 3.1    | 2277   | -1.0   | 27.1   | -3.2   | 16.2   | 8.0    | 6828   | 3.5    | 3637   | -0.1   | 35.3   | -7.1   |
|                                                            | 1473.6 | -3.7   | 140.4  | 1.0    | 19050   | 2.4    | 2312   | 0.5    | 28.2   | 0.7    | 16.0   | 6.7    | 6505   | -1.4   | 3539   | -2.8   | 34.3   | -9.7   |
|                                                            | 1509.6 | -1.3   | 147.4  | 6.0    | 19568   | 5.2    | 2335   | 1.5    | 27.8   | -0.7   | 14.9   | -0.7   | 6661   | 0.9    | 3782   | 3.9    | 36.3   | -4.5   |
| Average value (mg/kg)                                      | 1523.2 |        | 144.3  |        | 19218.7 |        | 2338.8 |        | 27.8   |        | 15.7   |        | 6781.1 |        | 3678.4 |        | 36.2   |        |
| Reference value (mg/kg)                                    | 1530.0 |        | 139.0  |        | 18600   |        | 2300   |        | 28.0   |        | 15.0   |        | 6600.0 |        | 3640.0 |        | 38.0   |        |
| Relative error (%)                                         | -0.4   |        | 3.8    |        | 3.3     |        | 1.7    |        | -0.8   |        | 4.5    |        | 2.7    |        | 1.1    |        | -4.7   |        |
| Standard deviation (mg/kg)                                 | 42.0   |        | 3.5    |        | 676.3   |        | 54.8   |        | 0.7    |        | 0.5    |        | 146.0  |        | 97.7   |        | 1.4    |        |
| Relative standard deviation (RSD) (%)                      | 2.8    |        | 2.4    |        | 3.5     |        | 2.3    |        | 2.3    |        | 3.1    |        | 2.2    |        | 2.7    |        | 3.7    |        |
| $\Delta \log C$                                            | -0.002 |        | 0.016  |        | 0.014   |        | 0.007  |        | -0.004 |        | 0.019  |        | 0.012  |        | 0.005  |        | -0.021 |        |



**Table S7** Quantitative characteristics of the proposed method for the target analytes

| Analytes | LOD <sup>a</sup> (mg kg <sup>-1</sup> ) | LOQ <sup>b</sup> (mg kg <sup>-1</sup> ) | LR <sup>c</sup> (mg kg <sup>-1</sup> ) | r <sup>2d</sup> |
|----------|-----------------------------------------|-----------------------------------------|----------------------------------------|-----------------|
| Ca       | 0.476                                   | 1.570                                   | 50–4000                                | 0.9998          |
| Fe       | 0.141                                   | 0.470                                   | 5–600                                  | 0.9997          |
| K        | 0.285                                   | 0.950                                   | 200–20000                              | 0.9996          |
| Mg       | 0.151                                   | 0.503                                   | 50–4000                                | 0.9998          |
| Mn       | 0.036                                   | 0.120                                   | 5–200                                  | 0.9999          |
| Na       | 0.088                                   | 0.293                                   | 5–200                                  | 0.9995          |
| P        | 1.296                                   | 4.320                                   | 200–20000                              | 0.9996          |
| S        | 2.113                                   | 7.043                                   | 50–5000                                | 0.9995          |
| Zn       | 0.137                                   | 0.457                                   | 5–200                                  | 0.9998          |

<sup>a</sup> Limit of detection; <sup>b</sup> Limit of quantification; <sup>c</sup> Linear range; <sup>d</sup> Coefficient of determination;
